# Supplementary material
Source: Frontiers journal article supplement (https://www.frontiersin.org/articles/529736)
Supplement: Image_1.pdf [file Image_1.pdf]

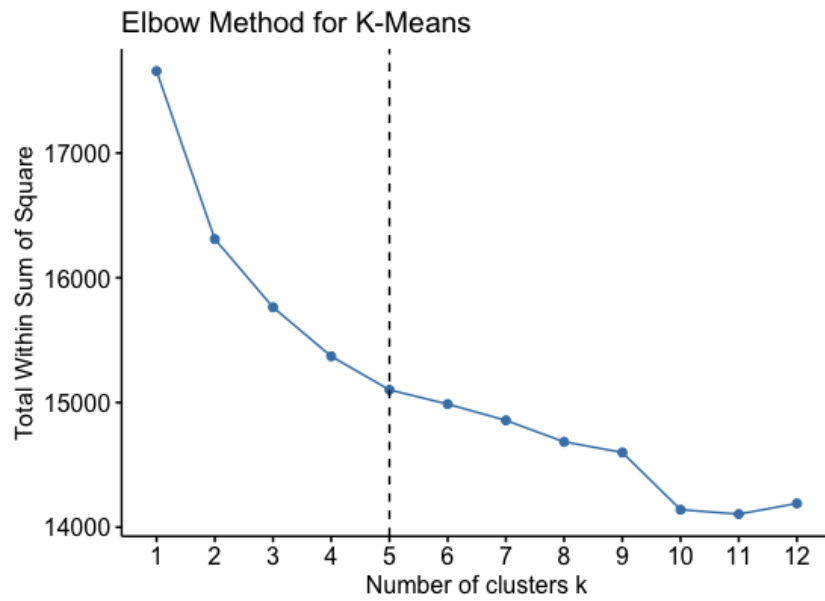

**Supplementary Fig. 1** K-means clustering: the change of total within sum of square with different number of clusters.
